1 **The interplay between sulfur metabolism and desulfurization profile in**  
2 ***Rhodococcus*: Unraveling the role of the transsulfuration pathway**

3

4 Olga Martzoukou<sup>1</sup>, Panayiotis Glekas<sup>1</sup>, Margaritis Avgeris<sup>2,3</sup>, Diomi Mamma<sup>4</sup>, Andreas  
5 Scorilas<sup>2</sup>, Dimitris Kekos<sup>4</sup>, Sotiris Amillis<sup>1</sup>, Dimitris G. Hatzinikolaou<sup>1,\*</sup>

6

7 *<sup>1</sup>Enzyme and Microbial Biotechnology Unit, Department of Biology, National and*  
8 *Kapodistrian University of Athens, Athens, Greece*

9 *<sup>2</sup>Sector of Biochemistry and Molecular Biology, Department of Biology, National and*  
10 *Kapodistrian University of Athens, Athens, Greece*

11 *<sup>3</sup>Laboratory of Clinical Biochemistry - Molecular Diagnostics, Second Department of*  
12 *Pediatrics, School of Medicine, National and Kapodistrian University of Athens, "P. & A.*  
13 *Kyriakou" Children's Hospital, Athens, Greece*

14 *<sup>4</sup>Biotechnology Laboratory, Sector of Synthesis and Development of Industrial Processes (IV),*  
15 *School of Chemical Engineering, National Technical University of Athens, Athens, Greece*

16

17 \* To whom correspondence should be addressed:

18 Email: [dhatzini@biol.uoa.gr](mailto:dhatzini@biol.uoa.gr)

19

20 **Keywords**

21 *Rhodococcus qingshengii* IGTS8; Biodesulfurization; Biocatalysis; Genetic engineering;

22 Reverse transsulfuration; Sulfur metabolism

## 23 **Abstract**

24 Biodesulfurization (BDS) is a process that selectively removes sulfur from dibenzothiophene  
25 and its derivatives. Several natural biocatalysts have been isolated, all harboring the highly  
26 conserved desulfurization operon *dszABC*. Even though the desulfurization phenotype is  
27 known to be significantly repressed by methionine, cysteine, and inorganic sulfate, the  
28 available information on the metabolic regulation of gene expression is still limited. In this  
29 study, scarless knockouts of the sulfur metabolism-related *cbs* and *metB* genes are constructed  
30 in the desulfurizing strain *Rhodococcus* sp. IGTS8. We provide sequence analyses for both  
31 enzymes of the reverse transsulfuration pathway and report their involvement in the sulfate-  
32 and methionine-dependent repression of the biodesulfurization phenotype, based on  
33 desulfurization assays in the presence of different sulfur sources. Additionally, the positive  
34 effect of *cbs* and *metB* gene deletions on *dsz* gene expression in the presence of both sulfate  
35 and methionine, but not cysteine, is uncovered and highlighted.

36

## 37 **Introduction**

38

39 Microbial elimination of dibenzothiophene (DBT) and related organosulfur compounds, could  
40 allow for the biodesulfurization (BDS) of oil products by selectively removing sulfur from  
41 carbon-sulfur bonds, thus maintaining the calorific value of the fuel (1, 2). The process is  
42 mediated by the well-characterized 4S metabolic pathway that is found in several genera, with  
43 the most prominent that of *Rhodococci* (3). The three BDS genes are organized in a plasmid-  
44 borne operon, *dszABC*, and encode for a DBT-sulfone monooxygenase (*dszA*), a 2-  
45 hydroxybiphenyl-2-sulfinate (HBPS) desulfinase (*dszB*), and a DBT monooxygenase (*dszC*),  
46 respectively. A fourth chromosomal gene, designated *dszD*, encodes for an NADH-FMN  
47 reductase that energetically supports the pathway. One of the major disadvantages in exploiting  
48 the biotechnological potential of the BDS process is the sulfate, methionine, and cysteine-  
49 mediated transcriptional repression of *dsz* genes through a putative repressor-binding site in  
50 the  $P_{dsz}$  promoter. The operon is de-repressed in the presence of organosulfurs such as DBT  
51 and dimethyl sulfoxide (DMSO), and Dsz enzymes are considered sulfate-starvation-induced  
52 (SSI) proteins (4–6). However, information on the repression mechanism is still limited, and  
53 until recently, the sulfur assimilation pathways of *Rhodococci* had only been investigated *in*  
54 *silico* (7, 8). An exception is a very recent report that conducted comparative genomics and  
55 untargeted metabolomics analyses in *Rhodococcus qingshengii* IGTS8 and proposed a working  
56 model for assimilatory sulfur metabolism reprogramming in the presence of DBT (4).

57

### 58 ***The Methionine-Cysteine interconversion pathways in bacteria***

59 L-methionine and L-cysteine, the sulfur-containing amino acids responsible for *dsz*  
60 repression, are interconverted with the intermediary formation of L-homocysteine and L-  
61 cystathionine through the transsulfuration metabolic pathway.

62 L-methionine can be converted to L-homocysteine, an important intermediate of the  
63 transsulfuration pathway, via two possible routes (**Figure 1A**). The first requires the catalytic  
64 action of a methionine  $\gamma$ -lyase (M $\gamma$ L) for degradation to 2-oxobutanoate, NH<sub>4</sub><sup>+</sup>, and  
65 methanethiol (9). The latter is then oxidized to sulfide, H<sub>2</sub>O<sub>2</sub>, and formaldehyde by a methyl  
66 mercaptan oxidase (MMO) present in *Rhodococcus* strain IGTS8 (10). A direct sulfhydrylation  
67 pathway can follow to convert sulfide to L-homocysteine, in condensation with either O-  
68 succinyl-L-homoserine (OSHS) or O-acetyl-L-homoserine (OAHS), through the catalytic  
69 action of MetZ (OSHS) or MetY (OAHS), thus serving as a precursor for sulfur-containing  
70 amino acid biosynthesis (4, 11). A second pathway for methionine catabolism, validated for  
71 Gram-positive bacteria, involves the sequential formation of S-Adenosyl-L-methionine  
72 (SAM), S-Adenosyl-L-homocysteine (SAH), and then L-homocysteine (4, 12–16). In the first  
73 step of the *forward* transsulfuration pathway, a  $\gamma$ -replacement reaction of L-cysteine and an  
74 activated L-homoserine ester (OSHS or OAHS) generates L- cystathionine and succinate or  
75 acetate, respectively, with the catalytic action of a Cystathionine  $\gamma$ -synthase (C $\gamma$ S; **Figure 1B**,  
76 Reactions M1 and M2) (17, 18). In the second forward transsulfuration step, L-cystathionine  
77 is acted upon by a Cystathionine beta-lyase (C $\beta$ L) to form L-homocysteine and pyruvate.

78 In Mycobacteria, L-homocysteine has been shown to be converted to L-methionine  
79 through a methylation step but, in general, serves as the precursor for L-cysteine biosynthesis  
80 via the *reverse* transsulfuration pathway (18). Therein, a Cystathionine  $\beta$ -synthase (C $\beta$ S)-  
81 mediated condensation of L-homocysteine with L-serine generates L-cystathionine (**Figure**  
82 **1B**, Reaction C1), which is then cleaved into L-cysteine, 2-oxobutanoate and ammonia, by a  
83 Cystathionine  $\gamma$ -lyase (C $\gamma$ L; **Figure 1B**, Reaction M5). Both key enzymes of the *reverse*  
84 transsulfuration pathway, C $\beta$ S and, C $\gamma$ L, are pyridoxal phosphate (PLP)-dependent (19–22).  
85 This reverse transsulfuration metabolic route for L-Cysteine biosynthesis from L-Methionine  
86 has been also reported in mammals, yeasts, archaea and several other bacteria (13, 23–27). An

87 alternative pathway for L-cysteine biosynthesis reported for *Corynebacterium glutamicum* and  
88 *Rhodococcus* strain IGTS8 requires the O-acetyl-L-serine (OAS) sulfhydrylase, CYSK, for the  
89 condensation of sulfide and OAS (4, 28). In the opposite direction, a reaction mediated by L-  
90 cysteine desulfhydrase (CD) leads to L-cysteine degradation into sulfide, pyruvate, and  
91 ammonia (28).

92

93 ***Interconnection of transsulfuration and desulfurization pathways in Rhodococcus sp. and***  
94 ***related species***

95 The genome of the model desulfurizing bacterium, *R. qingshengii* IGTS8, harbors  
96 genes for C $\beta$ S and C- $\gamma$ S/L, an indication for an active reverse transsulfuration pathway. The  
97 gene product of *cbs* gene is annotated as a putative C $\beta$ S Rv1077, whereas the downstream  
98 located *metB* gene is predicted to encode a Cystathionine  $\gamma$ -synthase/lyase (C- $\gamma$ S/L). In one of  
99 the few reports providing information related to sulfur metabolism regulation in *Rhodococcus*  
100 sp., transposon mediated disruption of the *cbs* gene in the desulfurizing strain *R. erythropolis*  
101 KA2-5-1 led to induction of the *dsz* operon in the presence of sulfate and methionine, but not  
102 when cysteine or sulfite were used as sulfur sources (29). It was, therefore, suggested that  
103 sulfate and methionine are only indirectly involved in the repression of the *dsz* phenotype,  
104 contrastingly to cysteine and sulfite that are directly involved in the repression system. As  
105 inferred from the above referred literature, sulfur assimilation pathways and the regulation of  
106 *dsz* expression in response to different sulfur sources in desulfurizing *Rhodococcus* species,  
107 remains largely understudied *in vivo*.

108 Several genetic modifications were conducted with a direct biotechnological approach,  
109 aiming to increase the efficiency of BDS rather than elucidate the underlying sulfur  
110 assimilation regulatory mechanisms. As such, most of them engineer Gram-negative  
111 recombinant bacteria, such as *Escherichia coli* or *Pseudomonas* strains (30–32). However, a

112 major limiting factor when *P. putida* CECT5279 was used as a biocatalyst in a biphasic system  
113 is the mass transfer rate of DBT from the oil to the aqueous phase (33). *P. putida* and all G(-)  
114 bacteria lack the robust hydrophobic cell wall of *Rhodococcus* and related mycobacterial  
115 species, and therefore DBT uptake from the oil phase is not efficient without the use of co-  
116 solvents (34, 35). This observation highlights the role of bacterial surface properties, such as  
117 hydrophobicity and cell wall thickness, for efficient BDS in biphasic media. In this regard,  
118 *Rhodococcus* biocatalysts that have the advantageous traits associated with the genus, pose as  
119 ideal candidates for genetic enhancement. However, this approach has not been favorable,  
120 especially in terms of targeted genetic modifications, owing to the extremely low amenability  
121 of *Rhodococcus* spp. to genome editing (36). To date, only a few studies have used genetically  
122 engineered desulfurizing *Rhodococcus* strains, which however harbor non-stable expression  
123 vectors or randomly integrated transposon elements (29, 37–40), while none have introduced  
124 site-directed, genome-based modifications in IGTS8 or in any other *Rhodococcus* sp.  
125 desulfurizing strain.

126 In the present work, we generate recombinant IGTS8 biocatalysts to investigate the  
127 effects of potential gene targets on biodesulfurization activity. More specifically, we implement  
128 a precise, scarless, two-step double crossover genetic engineering approach for the deletion of  
129 two sulfur metabolism-related genes, designated *cbs* and *metB*, located within the genome of  
130 *R. qingshengii* IGTS8 (41). Moreover, we provide sequence analyses of the related protein  
131 products (C $\beta$ S and C- $\gamma$ S/L), with emphasis on highly conserved residues of the catalytic core,  
132 across various species. We present evidence that deletion of the *cbs* gene leads to the  
133 derepression of *dsz* phenotype mostly in the presence of sulfate, whereas the *metB* $\Delta$  engineered  
134 strain seems to preferably desulfurize DBT when grown in the presence of methionine.  
135 Furthermore, we report the regulatory role of both C $\beta$ S and METB (C- $\gamma$ S/L) in *dszABC*  
136 transcription levels in response to the presence of sulfate and methionine, but not cysteine.

137 Thus, we manage to indirectly mitigate the effect of sulfur source repression through targeted  
138 genome editing without modifying the native *dsz* operon.

139

## 140 **Results**

141

### 142 *Sequence analysis of the cbs-metB genetic locus*

143 In a previous study where random transposon insertion events were monitored in *R.*  
144 *erythropolis* KA2-5-1, it was shown that inactivation of *cbs* leads to high-level *dsz* genes  
145 expression in the presence of inorganic sulfate (29). However, under the same conditions, no  
146 transposon insertion events were isolated for the gene located downstream of the *cbs* locus,  
147 that of Cystathionine  $\gamma$ -synthase/lyase - C- $\gamma$ S/L (*metB*) (**Figure 2A**). Whole genome  
148 sequencing of *R. qingshengii* IGTS8 (41) revealed a 1386bp ORF for *cbs* and a 1173bp ORF  
149 for *metB*, with a similar organization to that of KA2-5-1 strain (29). The gene located upstream  
150 of the *cbs-metB* locus exhibits 61% identity with *M. tuberculosis* Rv1075c, a GDSL-Like  
151 esterase (46), while the gene downstream of *metB* is predicted to encode for an L-threonine  
152 ammonia-lyase. Analysis of the upstream flanking sequence of *cbs* suggests the presence of a  
153 bacterial promoter located ~100 bp before the *cbs* start codon (**Figure 2B**).

154 Based on sequence homology, IGTS8 C $\beta$ S consists of one N-terminal catalytic domain  
155 with the ability to bind PLP (7 - 296; pfam00291) and two C-terminal CBS regulatory motifs  
156 (CBS1, 330 - 397 and CBS2, 403 - 459; pfam00571) commonly referred to as the Bateman  
157 module (47, 48). In human and higher eukaryotes, the protein also harbors an N-terminal Heme  
158 binding domain of approximately 70 amino acid residues preceding the catalytic core domain,  
159 which has not been found in lower eukaryotes and prokaryotes (49–54). METB (C- $\gamma$ S/L)  
160 consists of a large Cysteine/Methionine metabolism-related PLP-binding domain  
161 (pfam01053), spanning almost the entire protein length (17 - 390) (**Figure 2C**). The translated

162 amino acid sequences of IGTS8 C $\beta$ S and METB were compared to other known C $\beta$ S and C-  
163  $\gamma$ S/L proteins, respectively. Multiple sequence alignments revealed the presence of six  
164 conserved blocks in the catalytic core of C $\beta$ S and three in the C-terminal Bateman module of  
165 the protein, whereas seven blocks are identified in METB (**Figure 3**). *M. tuberculosis* C $\beta$ S  
166 shows the highest similarity score to IGTS8 C $\beta$ S and shares extensive homology across the  
167 entire length of the protein (99% coverage, 83% Identity). Among the other known C $\beta$ S  
168 homologs, MccA from *B. subtilis*, an O-acetylserine dependent C $\beta$ S, shows a 41% overall  
169 identity for the compared region (65% coverage), although this protein completely lacks the C-  
170 terminal CBS1 and CBS2 regulatory domains. The *H. sapiens* and *S. cerevisiae* counterparts  
171 show 40% and 34% similarity, respectively, throughout both the Catalytic domain and the  
172 Bateman module of the C $\beta$ S protein. Residues of the catalytic cavity that interact with C $\beta$ S  
173 substrates and the cofactor PLP, are extremely well conserved across the compared sequences  
174 (**Figure 3A**, blue and yellow boxes respectively), whereas alignment of the C-terminal C $\beta$ S  
175 regions reveals several highly conserved residues, distributed in three blocks (**Figure 3B**).

176 The METB (C- $\gamma$ S/L) multiple sequence alignment includes the *M. tuberculosis* and *C.*  
177 *glutamicum* METB, the cystathionine  $\gamma$ -synthase from *E. coli*, and the cystathionine  $\gamma$ -lyases  
178 from yeast and human (**Figure 3C**). *M. tuberculosis* and *C. glutamicum*, which are closely  
179 related to *R. qingshengii* IGTS8, possess homologs with the highest identity scores (73% and  
180 65%, respectively), whereas coverage was high in all METB sequence alignments (95-99%).  
181 Notably, the C $\gamma$ S from the Gram-negative *E. coli* appears to have a lower similarity (42%) than  
182 the eukaryotic C $\gamma$ Ls from *S. cerevisiae* and *H. sapiens* (49% and 47%, respectively). This  
183 observation is in line with the predicted bifunctionality of IGTS8 METB as both C $\gamma$ L and C $\gamma$ S,  
184 a unique feature that allows the synthesis of L-cysteine through L-methionine via the reverse  
185 transsulfuration pathway (18, 55, 56).



186 To study the role of C $\beta$ S and METB (C- $\gamma$ S/L) in the regulation of *dsz* operon expression  
187 according to sulfur availability, scarless deletions of the corresponding genes (*cbs*,  
188 IGTS8\_peg3012; and *metB*, IGTS8\_peg3011) were performed with the use of the  
189 *pK18mobsacB* vector system (**Supplementary Figure S1A**; see also Materials and methods).  
190 The isogenic knockout strains *cbs* $\Delta$  and *metB* $\Delta$  retained the ability to grow on liquid minimal  
191 media without supplemental cysteine or methionine, although the absence of C $\beta$ S seems to  
192 have a negative effect on methionine-based growth (more details in the following paragraphs).  
193 We also tested the strains on solid minimal medium supplemented with 1 mM sulfate, DMSO,  
194 L-methionine, or L-cysteine. Our results indicate that all strains retain the ability to grow on  
195 basal salts medium (BSM), regardless of sulfur source addition (**Supplementary Figure S2B**).  
196 Thus, none of the constructed knockout strains is auxotrophic for methionine or cysteine,  
197 whereas none of the tested sulfur sources seems to lead to accumulation of intermediary toxic  
198 metabolites such as homocysteine, that could potentially inhibit growth (58).

199

200 ***Ethanol is the preferred C source for maximum growth and desulfurization activity of IGTS8***

201 To assess the effect of different carbon sources supplementation on BDS capability and  
202 determine the corresponding preferred carbon source for *R. qingshengii* IGTS8, we collected  
203 samples from actively growing cultures at three different time-points (early-log, mid-log, and  
204 late-log phase). Wild-type *Rhodococcus* cells were grown on either glucose, glycerol, or  
205 ethanol as sole carbon sources with 1 mM DMSO as sole sulfur source. Similarly to *R.*  
206 *erythropolis* KA2-5-1, the highest biomass and desulfurization activity for strain IGTS8 was  
207 obtained with the use of ethanol as a carbon source (59). On the contrary, utilization of glucose  
208 as a carbon source did not lead to a significant increase in biomass ( $0.12 \pm 0.02$  g/L) or to  
209 efficient BDS ( $0.30 \pm 0.01$  Units/mg DCW). In fact, cells did not exhibit a clear exponential  
210 growth even after 80 hours of incubation. The presence of glycerol as the sole carbon source

211 led to a maximum biomass of  $0.69 \pm 0.06$  g/L after 71 hours of growth and a BDS maximum  
212 of  $19.00 \pm 0.04$  Units/mg DCW mid-log, still lower than the maximum biomass ( $0.88 \pm 0.05$   
213 g/L) and catalytic activity ( $38.0 \pm 1.9$  Units/mg DCW) observed upon ethanol supplementation  
214 **(Figure 4)**.

215

#### 216 ***Recombinant strains exhibit an altered desulfurization profile for repressive sulfur sources***

217 We investigated the role of C $\beta$ S and C- $\gamma$ S/L in desulfurization capability of *R.*  
218 *qingshengii* IGTS8, by comparison of growth rates and biodesulfurization (BDS) activity for  
219 isogenic *cbsA*, *metBA* and wild-type strains. All strains were grown in the presence of ethanol  
220 as the sole carbon source, whereas the BDS phenotype was firstly determined under non-  
221 repressive conditions, with the supplementation of DMSO at both low and high concentrations  
222 (0.1 and 1 mM, respectively; **Figure 5A-C**). For each separate strain, growth was not affected  
223 by the amount of DMSO added, indicating the limited S requirements for both wt and  
224 recombinant strains. The same can be contended for the determined specific BDS activity,  
225 which was also practically unaffected in each strain, by DMSO concentration. The growth yield  
226 of wt and *metBA* strains ( $0.91 \pm 0.02$  g/L and  $1.25 \pm 0.02$  g/L, respectively; 0.1 mM DMSO)  
227 was increased compared to that of *cbsA* strain ( $0.70 \pm 0.02$  g/L; 0.1 mM DMSO). Comparison  
228 of respective maximum BDS activities (wt, 1mM DMSO:  $29.0 \pm 1.1$  Units/mg DCW; *cbsA*,  
229 0.1mM DMSO:  $18.1 \pm 1.9$  Units/mg DCW; *metBA*, 0.1mM DMSO:  $23.4 \pm 2.0$  Units/mg DCW)  
230 shows a possible negative effect of C $\beta$ S depletion on growth and BDS, for cells grown on  
231 DMSO as the sole sulfur source.

232 To determine the effect of *cbs* and *metB* gene deletions on cell growth and  
233 desulfurization activity in the presence of repressing sulfur sources, all strains were grown with  
234 the supplementation of sulfate, methionine, or cysteine as sole sulfur sources, at both low and  
235 high concentrations (0.1 mM and 1 mM). In all cases ethanol was used as the sole carbon

236 source. Interestingly, the growth rate of each strain remains mostly unaffected by the  
237 concentration of the sulfur source, however, the maximum growth yield for all strains was  
238 achieved with the higher concentration of sulfate (1 mM; **Figure 6**) and with the lower  
239 concentration of the two sulfur-containing amino acids, methionine, and cysteine (0.1 mM;  
240 **Figure 7** and **Figure 8**, respectively).

241 Sulfate addition in the bacterial culture efficiently represses the desulfurization  
242 phenotype of the wt strain, only when a high concentration is supplemented (1 mM; **Figure**  
243 **6A**). Deletion of *cbs* leads to a slightly reduced biomass maximum compared to wt ( $1.09 \pm 0.03$   
244 g/L and  $1.28 \pm 0.02$  g/L, respectively), but enhances desulfurization 9-fold, reaching up to  
245  $15.23 \pm 0.27$  Units/mg DCW for *cbsΔ* in the presence of 1 mM sulfate, compared to  $1.73 \pm$   
246  $0.17$  Units/mg DCW for the wt strain (**Figure 6A and 6B**). The METB-depleted strain exhibits  
247 an intermediate maximum growth yield ( $1.17 \pm 0.04$  g/L), but a significant BDS phenotype is  
248 observed only during the late-exponential phase for 1 mM sulfate ( $7.49 \pm 0.51$  Units/mg DCW;  
249 **Figure 6C**).

250 One surprising finding is that the *cbsΔ* strain grows less efficiently than the wt and  
251 *metBΔ* strains, when methionine is used as the sole sulfur source (Maximum biomass for  
252 0.1mM Methionine. wt:  $1.11 \pm 0.07$  g/L; *cbsΔ*:  $0.43 \pm 0.04$  g/L; *metBΔ*:  $0.92 \pm 0.08$  g/L; **Figure**  
253 **7**). In fact, this growth yield is one of the lowest observed for this strain. The BDS phenotype  
254 of the *cbsΔ* strain becomes evident after 65 hours of growth, while a preference for the low  
255 methionine concentration is also observed when comparing desulfurization activities ( $7.39 \pm$   
256  $0.01$  Units/mg DCW for 0.1 mM, versus  $3.65 \pm 0.31$  Units/mg DCW for 1 mM; **Figure 7B**).  
257 This observation is in line with the low growth yield reported for the transposon-disrupted *cbs*  
258 strain of *R. erythropolis* KA2-5-1, in the presence of 5 mM methionine (29). On the contrary,  
259 *metBΔ* strain can utilize methionine more efficiently than *cbsΔ* and exhibits important  
260 desulfurization activity after 65 hours of growth, with the addition of both low and high

261 concentrations of the sulfur source ( $13.1 \pm 0.65$  and  $15.4 \pm 0.13$  Units/mg DCW, respectively;  
262 **Figure 7C**). This phenotype is extremely interesting, especially when compared to the wt strain  
263 which is completely unable to desulfurize DBT, even in the presence of a low methionine  
264 concentration ( $0.46 \pm 0.06$  Units/mg DCW; **Figure 7A**).

265 Importantly, cysteine supplementation as the sole sulfur source in the culture medium  
266 results in complete inability of all three strains (wt, *cbsΔ* and *metBΔ*) to desulfurize DBT, even  
267 in the presence of low sulfur content (0.1 mM). However, growth is extremely efficient in all  
268 cases, reaching biomass maxima of 1.06 - 1.35 g/L after 90h of incubation. Based on this  
269 observation, it is highly likely that even low intracellular cysteine levels are an impeding factor  
270 in DBT biodesulfurization regardless of the reverse transsulfuration pathway functionality,  
271 possibly due to negative regulation of *dsz* operon expression (**Figure 8**).

272

273 *Gene deletion of cbs or metB leads to increased transcriptional levels of dszABC*  
274 *desulfurization genes in the presence of selected S sources*

275 To elucidate the effect of *cbs* and *metB* deletions on the transcriptional levels of *dszABC*  
276 desulfurization genes, as well as the regulation of *dsz*, *cbs* and *metB* gene expression in  
277 response to sulfur availability, we performed a series of qPCR reactions for wt, *cbsΔ* and *metBΔ*  
278 strains under repressive and non-repressive conditions. In the presence of DMSO as sole sulfur  
279 source (**Figure 9A**), *dszABC* genes are efficiently expressed regardless of *cbs* or *metB*  
280 deletions. Additionally, *cbs* and *metB* transcriptional levels do not exhibit significant changes  
281 in the presence of DMSO. Sulfate or methionine supplementation (**Figure 9B** and **9C**,  
282 respectively) leads to repression of *dszABC* expression for the wt strain, while both *cbsΔ* and  
283 *metBΔ* knockout strains exhibit increased expression levels of the three desulfurization genes  
284 (*dszABC*). Moreover, under the same conditions *metB* and *cbs* gene expression appears slightly  
285 elevated for the *cbsΔ* and *metBΔ* strains, respectively, compared to wt (**Figure 9B** and **9C**).

286 Interestingly, loss of *dszABC* transcription detected in the presence of cysteine (**Figure 9D**),  
287 not only for wt, but also for the two knockout strains. Furthermore, *cbs* and *metB* expression  
288 levels are slightly higher in the presence of cysteine for the wt strain, compared to other sulfur  
289 sources (**Figure 9A-C**). The results are in line with the observed sulfate- and methionine-  
290 related derepression of the desulfurization phenotype, in response to *cbs* and *metB* deletions.

291

## 292 **Discussion**

293

294 Even though certain aspects of sulfur metabolism are generally well characterized in  
295 other Gram-positive bacteria, such as *B. subtilis*, the regulation of sulfur-assimilation-related  
296 gene expression remains unclear in *Rhodococcal* desulfurizing species. This is a curiously  
297 paradoxical situation, given that *R. qingshengii* IGTS8 is the most extensively studied  
298 biocatalyst for industrial biodesulfurization applications. The main reason for this is the  
299 challenging nature of genetic engineering for the actinomycete genus *Rhodococcus*, due to its  
300 high GC-content and prohibitively low homologous recombination efficiencies (36, 60). To  
301 our knowledge, no other studies have reported targeted, genome-based manipulations in  
302 desulfurizing *Rhodococci*. Contrastingly, plasmid-based modifications have been commonly  
303 used, which, however, are less preferred for industrial-scale applications as they exhibit a lower  
304 degree of genetic stability. Other approaches to date only include the *in silico* modeling of  
305 sulfur assimilation and the most recent proteomics and metabolomics analyses in strain IGTS8  
306 (4, 8).

307 In the present work, we performed targeted and precise editing of the *R. qingshengii*  
308 IGTS8 genome for the first time, generating recombinant biocatalysts that harbor gene  
309 deletions of the two enzymes predicted to be involved in the reverse transsulfuration pathway.  
310 Importantly, primary amino acid sequence analyses of IGTS8 C $\beta$ S and C- $\gamma$ S/L (METB),

311 suggested the presence of highly conserved residue blocks that participate in active site  
312 configuration, binding of substrates and of the cofactor PLP. The high degree of similarity  
313 between the two IGTS8 enzymes and their respective counterparts found in the closely related  
314 species (61), *Mycobacterium tuberculosis* (83% Identity for C $\beta$ S, 73% Identity for METB),  
315 suggests a conserved function for these two proteins as Cystathionine  $\beta$ -synthase and  
316 Cystathionine  $\gamma$ -lyase reverse transsulfuration enzymes, respectively. This result is in line with  
317 previous reports suggesting the existence of an operational reverse transsulfuration pathway  
318 for the genus *Rhodococcus* (4, 29).

319 In accordance with our sequence analyses and multiple alignment results, the sulfur  
320 assimilation model proposed by Hirschler et al. (4), also identified C $\beta$ S as a cystathionine  $\beta$ -  
321 synthase and METB as a cystathionine  $\gamma$ -lyase. Interestingly, these authors also mention that  
322 sulfate addition in the culture medium leads to methionine production, and probably  
323 necessitates reverse transsulfuration metabolic reactions as the primary route for cysteine  
324 biosynthesis. Moreover, our study revealed a strategic role for C $\beta$ S and METB in Dsz-mediated  
325 sulfur assimilation from organosulfates such as dibenzothiophene (DBT). The key role of C $\beta$ S  
326 in sulfate- and methionine-mediated repression of the biodesulfurization phenotype agrees with  
327 previous results in a transposon-disrupted mutant of *R. erythropolis* KA2-5-1 (29). In the  
328 current study, however, the involvement of METB in the regulation of BDS is a novel finding.  
329 Our results indicate that biomass concentration and desulfurization capability are largely  
330 affected by the choice of sulfur source. This observation is in line with the findings of Hirschler  
331 et al. and Tanaka et al. (4, 29), as they report that the CysK-dependent alternative route for  
332 cysteine biosynthesis seems to be preferred under sulfate starvation conditions (BDS), however  
333 it is likely operating as a secondary pathway when sulfate is supplemented as the sole sulfur  
334 source. According to the same study, protein levels of C $\beta$ S and METB were slightly higher,  
335 but not significantly different between the DBT and inorganic sulfate cultures. Based on our

336 growth and desulfurization analyses, we further suggest that methionine supplementation  
337 resembles the sulfate-rich conditions and that the direct sulfhydrylation pathway is indeed  
338 operational in the background. This conjecture is based on the fact that during sulfate or  
339 methionine supplementation in the absence of C $\beta$ S or METB, a complete cysteine deficiency  
340 would have manifested otherwise. However, knockout strain *cbsA* exhibits a preference for  
341 higher sulfate concentration, whereas methionine utilization appears to be less efficient.  
342 Overall, *cbs* deletion leads to a slower growth rate under all conditions tested, except for  
343 cysteine supplementation. In contrast, growth yield does not appear to be affected by the  
344 absence of METB, as evidenced by the growth rates observed for the *metBA* knockout strain.

345         Furthermore, *metB* deletion promotes BDS mainly in the presence of methionine and  
346 to a lesser extent, in sulfate-grown cells. This desulfurization phenotype follows the same  
347 pattern as the one observed for the strain harboring a *cbs* genetic deletion, in the presence of  
348 methionine as sole sulfur source. A possible explanation for this involves differential regulation  
349 of sulfur assimilation via actively operating alternative routes, given that *dsz* expression levels  
350 do not seem to differ significantly for either of the two knockout strains in the presence of  
351 sulfate or methionine. The availability of sulfate is known to stimulate divergent routes for  
352 sulfate/sulfite reduction, while the latter serves as a metabolic branching point (4). Cysteine  
353 supplementation promotes growth for both knockout strains, which, however, do not exhibit  
354 the desulfurization phenotype. This is in line with the results reported by Tanaka et al. (29) for  
355 *R. erythropolis* KA2-5-1, as sulfate and methionine did not seem to be directly involved in the  
356 repression system, contrastingly to cysteine. Taking the suggested sulfur assimilation model  
357 into consideration, C $\beta$ S and METB likely promote an increase of the free cysteine pool via the  
358 reverse transsulfuration pathway, when either sulfate or methionine is used as the sole sulfur  
359 source. This in turn could allow for *dszABC* efficient expression in *cbsA* and *metBA* strains,



360 under sulfate- or methionine-rich conditions, given that sulfur-assimilation-genes expression is  
361 widely modulated in response to sulfur source availability (**Figure 10**) (4, 62).

362 Based on these observations, the levels of *cbs*, *metB*, and *dszABC* genes expression  
363 were quantified in response to sulfur source supplementation. As evidenced by transcript level  
364 comparison for wt and *cbsΔ* or *metBΔ* knockout strains, CβS and MetB exert an effect on *dsz*  
365 gene expression, possibly via the regulation of cysteine biosynthesis through the reverse  
366 transsulfuration pathway. Deletions of the two genes might lead to reduction, but not depletion,  
367 of intracellular cysteine levels, promoting the expression of sulfur-starvation-induced proteins  
368 which in turn leads to the observed increase in biodesulfurization activity. This hypothesis is  
369 in line with the complete lack of biodesulfurization activity and the non-detectable *dsz* genes  
370 expression that was observed for wt as well as the knockout strains, in the presence of  
371 exogenously supplemented cysteine as the sole sulfur source.

372 Taken together, our approach focuses on the metabolic engineering of sulfur  
373 metabolism without manipulation of the 4S pathway genes. We thus propose the involvement  
374 of CβS and METB in the reverse transsulfuration pathway of *Rhodococcus qingshengii* IGTS8  
375 and we validate the necessity of intact *cbs* and *metB* loci for the orchestration of *dsz*-mediated  
376 sulfur assimilation, in response to sulfur source availability.

377

## 378 **Materials and Methods**

379

### 380 *Strains, growth conditions, and plasmids*

381 The bacterial strains and plasmids used in this study are listed in Table 1. *Rhodococcus*  
382 *qingshengii* IGTS8 was obtained from ATCC (53968; Former names of the strain: *R.*  
383 *rhodochrous*, *R. erythropolis*). *Escherichia coli* DH5a and S17-1 strains were used for cloning  
384 and conjugation purposes, respectively. *Rhodococcus qingshengii* strains were routinely grown



385 in Luria-Bertani Peptone (LBP) broth (1% w/v Bactopeptone, 0.5% w/v Yeast extract, and 1%  
386 w/v NaCl) at 30°C with shaking (180-200 rpm), or on LBP agar plates at 30°C. *E. coli* strains  
387 were grown in LB medium (1% w/v Bactotryptone, 0.5% w/v Yeast extract, and 1% w/v NaCl)  
388 at 37°C with shaking (180-200 rpm) or on LB agar plates at 37°C. Kanamycin (50 µg/ml) was  
389 used for plasmid selection in *E. coli*. Kanamycin (200 µg/mL) and Nalidixic acid (10 µg/ml)  
390 were used to select *R. qingshengii* transconjugants in the culture media. Counter-selection was  
391 performed on no-salt LBP (NSLBP) plates with 10% (w/v) sucrose.

392 For growth tests on solid media, *R. qingshengii* cells were grown on basal salts medium  
393 (BSM) prepared according to (Karimi et al., 2017), containing 0.165 M ethanol (0.33 M  
394 carbon) as carbon source and 1% w/v agarose. Sulfur sources were supplemented at a final  
395 concentration of 1 mM S. For biodesulfurization studies, *R. qingshengii* wt and recombinant  
396 strains were grown on a sulfur-free chemically defined medium (CDM) containing 3.8 g  
397 NaH<sub>2</sub>PO<sub>4</sub>·H<sub>2</sub>O, 3.25 g Na<sub>2</sub>HPO<sub>4</sub>·7H<sub>2</sub>O, 0.8 g NH<sub>4</sub>Cl, 0.325 g MgCl<sub>2</sub>·6H<sub>2</sub>O, 0.03 g CaCl<sub>2</sub>·2H<sub>2</sub>O,  
398 8.5 g NaCl, 0.5 g KCl, 1 mL Metal Solution, and 1 mL of Vitamin solution in 1 L of distilled  
399 water (pH 7.0). The metal solution was composed (per L of distilled water): Na<sub>2</sub>-EDTA, 5.2 g;  
400 FeCl<sub>2</sub>·4H<sub>2</sub>O, 3 mg; H<sub>3</sub>BO<sub>3</sub>, 30 mg; MnCl<sub>2</sub>·4H<sub>2</sub>O, 100 mg; CoCl<sub>2</sub>·6H<sub>2</sub>O, 190 mg; NiCl<sub>2</sub>·6H<sub>2</sub>O,  
401 24 mg; CuCl<sub>2</sub>, 0.2 mg; ZnCl<sub>2</sub>, 0.5 mg; Na<sub>2</sub>MoO<sub>4</sub>·2H<sub>2</sub>O, 36 mg; Na<sub>2</sub>WO<sub>4</sub>·2H<sub>2</sub>O, 8 mg; and  
402 Na<sub>2</sub>SeO<sub>3</sub>·5H<sub>2</sub>O, 6 mg. The vitamin solution contained (per L of distilled water) calcium  
403 pantothenate, 50 mg; nicotinic acid, 100 mg; *p*-aminobenzoic acid, 40 mg; and pyridoxal  
404 hydrochloride, 150 mg. CDM was supplemented with sulfate, dimethyl sulfoxide (DMSO), L-  
405 methionine or, cysteine as the sole sulfur source (0.1 or 1 mM) and 0.165 M ethanol, 0.055 M  
406 glucose, or 0.110 M glycerol as carbon sources (0.33 M carbon), depending on the experiment.  
407 *pK18mobsacB* (Life Science Market, Europe) was used as a cloning and mobilization vector.

408

409 ***Enzymes and chemicals***

410 All restriction enzymes were purchased from TaKaRa Bio or Minotech (Lab Supplies  
411 Scientific SA, Hellas). Chemicals were purchased from Sigma-Aldrich (Kappa Lab SA, Hellas)  
412 and AppliChem (Bioline Scientific SA, Hellas). Conventional and high-fidelity PCR  
413 amplifications were performed using KAPA Taq DNA and Kapa HiFi polymerases,  
414 respectively (Kapa Biosystems, Roche Diagnostics, Hellas). All oligonucleotides were  
415 purchased from Eurofins Genomics (Vienna, Austria) and are listed in Table S2.

416

#### 417 ***Genetic manipulations and DNA sequence analysis***

418 The genomic DNA of *Rhodococcus* strain IGTS8 was isolated using the NucleoSpin Tissue  
419 DNA Extraction kit (Macherey-Nagel, Lab Supplies Scientific SA, Hellas) according to the  
420 manufacturer's instructions. Plasmid preparation and DNA gel extraction were performed  
421 using the Nucleospin Plasmid kit and the Nucleospin Extract II kit (Macherey-Nagel, Lab  
422 Supplies Scientific SA, Hellas). DNA sequences were determined by Eurofins-Genomics  
423 (Vienna, Austria). The online software BPROM was used for bacterial promoter prediction  
424 (<http://www.softberry.com/cgi-bin/programs/gfindb/bprom.pl>).

425

#### 426 ***Construction of knockout strains***

427 Unmarked, precise gene deletions of Cystathionine  $\beta$ -synthase (*cbs*) or Cystathionine  $\gamma$ -  
428 lyase/synthase (*metB*) were created using a two-step allelic exchange protocol (43). Upstream  
429 and downstream flanking regions of the *cbs* gene of strain IGTS8 were amplified and cloned  
430 into the pK18mobsacB vector (44), using the primer pairs *cbsUp-F/Up-R* and *cbsDown-*  
431 *F/Down-R*, respectively, yielding plasmid pIGTS8*cbs*. Similarly, for the flanking regions of  
432 *metB* gene, primer pairs *metBUp-F/Up-R* and *metBDown-F/Down-R* were used to construct  
433 plasmid pIGTS8*metB*. *E. coli* S17-1 competent cells were transformed with each of the  
434 modified plasmids. *R. qingshengii* IGTS8 knockouts were created after conjugation (45) with

435 *E. coli* S17-1 transformants, using a two-step homologous recombination (HR) process.  
436 Following the first crossover event, sucrose-sensitive and kanamycin-resistant IGTS8  
437 transconjugants were grown in LB overnight with shaking (180 rpm), to induce the second HR  
438 event. Recombinant strains were grown on selective media containing 10% (w/v) sucrose and  
439 tested for kanamycin sensitivity, to remove incomplete crossover events. Gene deletions *cbsA*  
440 and *metBΔ* were identified with PCR and confirmed by DNA sequencing, using external primer  
441 pairs *cbs-5F-check-F/cbs-metB-3R-check* and *metB-5F-check/metB-3R-check*, respectively.

442

#### 443 ***Growth and desulfurization assays***

444 For growth studies and resting-cells' biodesulfurization assays, wild-type and recombinant *R.*  
445 *qingshengii* strains were grown in CDM under different carbon and sulfur source type and  
446 concentrations. Growth took place in 96-well cell culture plates (F-bottom; Greiner Bio-One,  
447 Fischer Scientific, US) with 200  $\mu$ L working volume in thermostated plate-shakers at 30 °C  
448 and 600 rpm (PST-60HL, BioSan, Pegasus Analytical SA, Hellas). For each condition, an  
449 initial biomass concentration of 0.045-0.055 g/L was applied, while 20 identical well-cultures  
450 were used. Biomass concentration, expressed as Dry Cell Weight (DCW), was estimated by  
451 measurement of optical density at 600 nm with a Multiskan GO Microplate Spectrophotometer  
452 (Thermo Fisher Scientific, Waltham, MA USA), and calculations were based on an established  
453 calibration curve.

454 For the resting-cells biodesulfurization assays, the content of 2 to 4 identical well-cultures  
455 was harvested at early-, mid- and late-exponential phase, centrifuged at 3.000 rpm for 10 min,  
456 and the medium was discarded. Pellets were washed with a S-free buffer of pH 7.0 (Ringer's),  
457 and cells were resuspended in 0.45 ml of 50 mM HEPES buffer, pH 8.0. Suspensions were  
458 separated into three equal volume aliquots (0.15 mL) in Eppendorf tubes. 0.15 mL of a 2 mM  
459 DBT solution in the same buffer were added in each tube, and desulfurization reaction took

460 place under shaking (1200 rpm) for 30 min in a thermostated Eppendorf shaker (Thermo  
461 Shaker TS-100, BOECO, Germany). The reaction was terminated with the addition of equal  
462 volume (0.3 ml) acetonitrile (Labbox Export, Kappa Lab SA, Hellas) and vigorous vortexing.  
463 Suspensions were centrifuged (14.000xg; 10 min), and 2-HBP produced was determined in the  
464 collected supernatant through HPLC. One of the tubes, where the 0.3 mL acetonitrile was added  
465 immediately after DBT addition ( $t=0$ ), was used as blank. Desulfurization capability was  
466 expressed as Units per mg dry cell weight, where 1 Unit corresponds to the release of 1 nmole  
467 of 2-HBP per hour. The linearity of the above-described assay with respect to biomass  
468 concentration has been verified for up to 2 h reaction time and up to 100  $\mu$ M 2-HBP produced.

469

#### 470 ***HPLC analysis***

471 High-performance liquid chromatography (HPLC) was used to quantify 2-HBP and DBT. The  
472 analysis was performed on an Agilent HPLC 1220 Infinity LC System, equipped with a  
473 fluorescence detector (FLD). A C18 reversed phase column (Poroshell 120 EC-C18, 4  $\mu$ m,  
474 4.6x150 mm, Agilent) was used for the separation. Elution profile (at 1.2 mL/min) consisted  
475 of 4 min isocratic elution with 60/40 (v/v) acetonitrile/H<sub>2</sub>O, followed by a 15 min linear  
476 gradient to 100% acetonitrile. Fluorescence detection was performed with excitation and  
477 emission wavelengths of 245 nm and 345 nm, respectively. Quantification was performed  
478 using appropriate calibration curves with the corresponding standards (linear range 10 - 1000  
479 ng/mL).

480

#### 481 ***Extraction of total RNA***

482 *R. qingshengii* IGTS8 wild-type, *cbsA*, and *metBA* deletion strains were grown in CDM  
483 medium containing DMSO, MgSO<sub>4</sub>, methionine, or cysteine as the sole sulfur source (1 mM  
484 S). Ethanol was used as a carbon source to a final concentration of 0.165 M (0.33 M carbon).

485 Cells were harvested in mid-exponential phase and incubated with lysozyme (20 mg/ml) for  
486 2h at 25 °C. Total RNA isolation was performed using NucleoSpin RNA kit (Macherey-Nagel,  
487 Lab Supplies Scientific SA, Hellas) according to manufacturer guidelines. RNA samples were  
488 treated with DNase I as part of the kit procedure to eliminate any genomic DNA contamination.  
489 RNA concentration and purity were determined at 260 and 280 nm using an  $\mu$ Drop Plate with  
490 a Multiskan GO Microplate Spectrophotometer (Thermo Fisher Scientific, Waltham, MA  
491 USA), while RNA integrity was evaluated by agarose gel electrophoresis.

492

### 493 ***First-strand cDNA synthesis***

494 Reverse transcription took place in a 20  $\mu$ L reaction containing 500 ng total RNA template, 0.5  
495 mM dNTPs mix, 200U SuperScript II Reverse Transcriptase (Invitrogen, Antisel SA, Hellas),  
496 40U RNaseOUT Recombinant Ribonuclease Inhibitor (Invitrogen, Antisel SA, Hellas) and 4  
497  $\mu$ M random hexamer primers (Takara Bio, Lab Supplies Scientific SA, Hellas). Reverse  
498 transcription was performed at 42 °C for 50 min, followed by enzyme inactivation at 70 °C for  
499 15 min. The concentration of cDNA was determined using an  $\mu$ Drop Plate with a Multiskan  
500 GO Microplate Spectrophotometer (Thermo Fisher Scientific, Waltham, MA USA).

501

### 502 ***Quantitative Real-Time PCR (qPCR)***

503 qPCR assays were performed on the 7500 Real-Time PCR System (Applied Biosystems,  
504 Carlsbad, CA) using SYBR Green I dye for the quantification of *dszA*, *dszB*, *dszC*, *cbs*, and  
505 *metB* transcript levels. Specific primers were designed based on the published sequences of  
506 IGTS8 desulfurization operon (GenBank: U08850.1 for *dszABC*) and IGTS8 chromosome  
507 (GenBank: CP029297.1 for *cbs*, *metB*, *gyrB*) and are listed in Table S2. The gene-specific  
508 amplicons generated were 143 bp for *dszA*, 129 bp for *dszB*, 152 bp for *dszC*, 226 bp for *cbs*,  
509 129 bp for *metB* and 158 bp for *gyrB*. The 10  $\mu$ L reaction mixture included 5  $\mu$ L Kapa SYBR

510 Fast Universal 2x qPCR master mix (Kapa Biosystems, Lab Supplies Scientific SA, Hellas), 5  
511 ng of cDNA template, and 200 nM of each specific primer. The thermal protocol was initiated  
512 at 95 °C for 3 min for polymerase activation, followed by 40 cycles of denaturation at 95 °C  
513 for 15 sec, and primer annealing and extension at 60 °C for 1 min. Following amplification,  
514 melt curve analyses were carried out to distinguish specific amplicons from non-specific  
515 products and/or primer dimers. All qPCR reactions were performed using two technical  
516 replications for each tested sample and target, and the average CT of each duplicate was used  
517 in quantification analyses, according to the  $2^{-\Delta\text{CCT}}$  relative quantification (RQ) method. The  
518 DNA gyrase subunit B (*gyrB*) gene from strain IGTS8 was used as an internal reference control  
519 for normalization purposes. A biological replicate of a cDNA sample derived from *R.*  
520 *qingshengii* IGTS8 grown on 1 mM DMSO for 66 h was used as our assay calibrator.

521

## 522 **Acknowledgments**

523

524 We thank Jacob Bobonis (EMBL Heidelberg) for the S17-1 strain. This research project was  
525 supported by the Action RESEARCH – CREATE – INNOVATE co-financed by the European  
526 Regional Development Fund of the European Union and national resources through the  
527 Operational Program “Competitiveness, Entrepreneurship & Innovation” (EPAnEK) - NSRF  
528 (2014-2020) (Project code: T1EDK-02074, MIS 5030227).

529

## 530 **References**

531

- 532 1. J. J. Kilbane, Microbial biocatalyst developments to upgrade fossil fuels. *Curr. Opin.*  
533 *Biotechnol.* **17**, 305–314 (2006).
- 534 2. J. J. Kilbane, Biodesulfurization: How to Make it Work? *Arab. J. Sci. Eng.* **42**, 1–9 (2017).

- 535 3. N. Gupta, P. K. Roychoudhury, J. K. Deb, Biotechnology of desulfurization of diesel:  
536 prospects and challenges. *Appl. Microbiol. Biotechnol.* **66**, 356–366 (2005).
- 537 4. A. Hirschler, *et al.*, Biodesulfurization Induces Reprogramming of Sulfur Metabolism in  
538 *Rhodococcus qingshengii* IGTS8: Proteomics and Untargeted Metabolomics. *Microbiol*  
539 *Spectr*, e0069221 (2021).
- 540 5. M. Z. Li, C. H. Squires, D. J. Monticello, J. D. Childs, Genetic analysis of the dsz promoter  
541 and associated regulatory regions of *Rhodococcus erythropolis* IGTS8. *J. Bacteriol.* **178**,  
542 6409–6418 (1996).
- 543 6. P. Murarka, T. Bagga, P. Singh, S. Rangra, P. Srivastava, Isolation and identification of a  
544 TetR family protein that regulates the biodesulfurization operon. *AMB Express* **9**, 71  
545 (2019).
- 546 7. S. Aggarwal, I. A. Karimi, J. J. Kilbane II, D. Y. Lee, Roles of sulfite oxidoreductase and  
547 sulfite reductase in improving desulfurization by *Rhodococcus erythropolis*. *Mol. Biosyst.*  
548 **8**, 2724–2732 (2012).
- 549 8. S. Aggarwal, I. A. Karimi, D. Y. Lee, Flux-based analysis of sulfur metabolism in  
550 desulfurizing strains of *Rhodococcus erythropolis*. *FEMS Microbiol. Lett.* **315**, 115–121  
551 (2011).
- 552 9. D. Kudou, E. Yasuda, Y. Hirai, T. Tamura, K. Inagaki, Molecular cloning and  
553 characterization of l-methionine  $\gamma$ -lyase from *Streptomyces avermitilis*. *J. Biosci. Bioeng.*  
554 **120**, 380–383 (2015).
- 555 10. S.-J. Kim, H.-J. Shin, Y.-C. Kim, D.-S. Lee, J.-W. Yang, Isolation and purification of  
556 methyl mercaptan oxidase from *Rhodococcus rhodochrous* for mercaptan detection.  
557 *Biotechnol. Bioprocess Eng.* **5**, 465–468 (2000).



- 558 11. B.-J. Hwang, H.-J. Yeom, Y. Kim, H.-S. Lee, *Corynebacterium glutamicum* utilizes both  
559 transsulfuration and direct sulfhydrylation pathways for methionine biosynthesis. *J.*  
560 *Bacteriol.* **184**, 1277–1286 (2002).
- 561 12. B. J. Berger, M. H. Knodel, Characterisation of methionine adenosyltransferase from  
562 *Mycobacterium smegmatis* and *M. tuberculosis*. *BMC Microbiol.* **3**, 12 (2003).
- 563 13. M.-F. Hullo, *et al.*, Conversion of methionine to cysteine in *Bacillus subtilis* and its  
564 regulation. *J. Bacteriol.* **189**, 187–197 (2007).
- 565 14. J. D. Lozada-Ramírez, I. Martínez-Martínez, A. Sánchez-Ferrer, F. García-Carmona, S-  
566 adenosylhomocysteine hydrolase from *Corynebacterium glutamicum*: cloning,  
567 overexpression, purification, and biochemical characterization. *J. Mol. Microbiol.*  
568 *Biotechnol.* **15**, 277–286 (2008).
- 569 15. M. C. M. Reddy, *et al.*, Crystal structures of *Mycobacterium tuberculosis* S-adenosyl-L-  
570 homocysteine hydrolase in ternary complex with substrate and inhibitors. *Protein Sci.* **17**,  
571 2134–2144 (2008).
- 572 16. D. A. Rodionov, A. G. Vitreschak, A. A. Mironov, M. S. Gelfand, Comparative genomics  
573 of the methionine metabolism in Gram-positive bacteria: a variety of regulatory systems.  
574 *Nucleic Acids Res.* **32**, 3340–3353 (2004).
- 575 17. C. Rückert, A. Pühler, J. Kalinowski, Genome-wide analysis of the L-methionine  
576 biosynthetic pathway in *Corynebacterium glutamicum* by targeted gene deletion and  
577 homologous complementation. *J. Biotechnol.* **104**, 213–228 (2003).
- 578 18. P. R. Wheeler, *et al.*, Functional demonstration of reverse transsulfuration in the  
579 *Mycobacterium tuberculosis* complex reveals that methionine is the preferred sulfur  
580 source for pathogenic *Mycobacteria*. *J. Biol. Chem.* **280**, 8069–8078 (2005).



- 581 19. S. M. Aitken, J. F. Kirsch, The enzymology of cystathionine biosynthesis: strategies for  
582 the control of substrate and reaction specificity. *Arch. Biochem. Biophys.* **433**, 166–175  
583 (2005).
- 584 20. M. C. Clifton, *et al.*, Structure of the cystathionine  $\gamma$ -synthase MetB from *Mycobacterium*  
585 *ulcerans*. *Acta Crystallogr. Sect. F Struct. Biol. Cryst. Commun.* **67**, 1154–1158 (2011).
- 586 21. S. Devi, S. A. Abdul Rehman, K. F. Tarique, S. Gourinath, Structural characterization and  
587 functional analysis of cystathionine  $\beta$ -synthase: an enzyme involved in the reverse  
588 transsulfuration pathway of *Bacillus anthracis*. *FEBS J.* **284**, 3862–3880 (2017).
- 589 22. B. Saha, S. Mukherjee, A. K. Das, Molecular characterization of *Mycobacterium*  
590 tuberculosis cystathionine gamma synthase--apo- and holoforms. *Int. J. Biol. Macromol.*  
591 **44**, 385–392 (2009).
- 592 23. H. Takagi, I. Ohtsu, L-cysteine metabolism and fermentation in microorganisms. *Adv.*  
593 *Biochem. Eng. Biotechnol.* **159**, 129–151 (2017).
- 594 24. D. Thomas, Y. Surdin-Kerjan, Metabolism of sulfur amino acids in *Saccharomyces*  
595 *cerevisiae*. *Microbiol. Mol. Biol. Rev.* **61**, 503–532 (1997).
- 596 25. D. Zhou, R. H. White, Transsulfuration in archaebacteria. *J. Bacteriol.* **173**, 3250–3251  
597 (1991).
- 598 26. N. C. Doherty, *et al.*, In *Helicobacter pylori*, LuxS is a key enzyme in cysteine provision  
599 through a reverse transsulfuration pathway. *J. Bacteriol.* **192**, 1184–1192 (2010).
- 600 27. B. Sperandio, P. Polard, D. S. Ehrlich, P. Renault, E. Guédon, Sulfur amino acid  
601 metabolism and its control in *Lactococcus lactis* IL1403. *J. Bacteriol.* **187**, 3762–3778  
602 (2005).
- 603 28. M. Wada, N. Awano, K. Haisa, H. Takagi, S. Nakamori, Purification, characterization and  
604 identification of cysteine desulfhydrase of *Corynebacterium glutamicum*, and its  
605 relationship to cysteine production. *FEMS Microbiol. Lett.* **217**, 103–107 (2002).

- 606 29. Y. Tanaka, O. Yoshikawa, K. Maruhashi, R. Kurane, The cbs mutant strain of  
607 *Rhodococcus erythropolis* KA2-5-1 expresses high levels of Dsz enzymes in the presence  
608 of sulfate. *Arch. Microbiol.* **178**, 351–357 (2002).
- 609 30. B. Galán, E. Díaz, J. L. García, Enhancing desulphurization by engineering a flavin  
610 reductase-encoding gene cassette in recombinant biocatalysts. *Environ. Microbiol.* **2**, 687–  
611 694 (2000).
- 612 31. S. Khosravinia, M. A. Mahdavi, R. Gheshlaghi, H. Dehghani, B. Rasekh, Construction  
613 and characterization of a new recombinant vector to remove sulfate repression of dsz  
614 promoter transcription in biodesulfurization of dibenzothiophene. *Front. Microbiol.* **9**  
615 (2018).
- 616 32. I. Martínez, M. E.-S. Mohamed, D. Rozas, J. L. García, E. Díaz, Engineering synthetic  
617 bacterial consortia for enhanced desulfurization and revalorization of oil sulfur  
618 compounds. *Metab. Eng.* **35**, 46–54 (2016).
- 619 33. K. Boltes, R. Alonso del Aguila, E. García-Calvo, Effect of mass transfer on  
620 biodesulfurization kinetics of alkylated forms of dibenzothiophene by *Pseudomonas*  
621 *putida* CECT5279. *J. Chem. Technol. Biotechnol.* **88**, 422–431 (2013).
- 622 34. A. Caro, P. Letón, E. García-Calvo, L. Setti, Enhancement of dibenzothiophene  
623 biodesulfurization using  $\beta$ -cyclodextrins in oil-to-water media. *Fuel* **86**, 2632–2636  
624 (2007).
- 625 35. A. T. Vincent, *et al.*, The Mycobacterial cell envelope: A relict from the past or the result  
626 of recent evolution? *Front. Microbiol.* **9**, 2341 (2018).
- 627 36. Y. Liang, H. Yu, Genetic toolkits for engineering *Rhodococcus* species with versatile  
628 applications. *Biotechnol. Adv.* **49**, 107748 (2021).

- 629 37. G.-Q. Li, *et al.*, Genetic rearrangement strategy for optimizing the dibenzothiophene  
630 biodesulfurization pathway in *Rhodococcus erythropolis*. *Appl. Environ. Microbiol.* **74**,  
631 971–976 (2008).
- 632 38. G.-Q. Li, *et al.*, Improvement of dibenzothiophene desulfurization activity by removing  
633 the gene overlap in the *dsz* operon. *Biosci. Biotechnol. Biochem.* **71**, 849–854 (2007).
- 634 39. T. Matsui, K.-I. Noda, Y. Tanaka, K. Maruhashi, R. Kurane, Recombinant *Rhodococcus*  
635 sp. strain T09 can desulfurize DBT in the presence of inorganic sulfate. *Curr. Microbiol.*  
636 **45**, 240–244 (2002).
- 637 40. J. Wang, *et al.*, Enhancement of Microbial Biodesulfurization via Genetic Engineering and  
638 Adaptive Evolution. *PLoS One* **12**, e0168833 (2017).
- 639 41. D. Thompson, *et al.*, Phylogenomic Classification and Biosynthetic Potential of the Fossil  
640 Fuel-Biodesulfurizing *Rhodococcus* Strain IGTS8. *Front. Microbiol.* **11**, 1417 (2020).
- 641 42. E. Karimi, *et al.*, DBT desulfurization by decorating *Rhodococcus erythropolis* IGTS8  
642 using magnetic Fe<sub>3</sub>O<sub>4</sub> nanoparticles in a bioreactor. *Eng. Life Sci.* **17**, 528–535 (2017).
- 643 43. H. Zhang, *et al.*, 4-Chlorophenol oxidation depends on the activation of an AraC-type  
644 transcriptional regulator, CphR, in *Rhodococcus* sp. Strain YH-5B. *Front. Microbiol.* **9**,  
645 2481 (2018).
- 646 44. A. Schäfer, *et al.*, Small mobilizable multi-purpose cloning vectors derived from the  
647 *Escherichia coli* plasmids pK18 and pK19: selection of defined deletions in the  
648 chromosome of *Corynebacterium glutamicum*. *Gene* **145**, 69–73 (1994).
- 649 45. R. van der Geize, Unmarked gene deletion mutagenesis of *kstD*, encoding 3-ketosteroid  
650  $\Delta$ 1-dehydrogenase, in *Rhodococcus erythropolis* SQ1 using *sacB* as counter-selectable  
651 marker. *FEMS Microbiol. Lett.* **205**, 197–202 (2001).
- 652 46. D. Yang, *et al.*, Rv1075c of *Mycobacterium tuberculosis* is a GDSL-Like Esterase and Is  
653 Important for Intracellular Survival. *J. Infect. Dis.* **220**, 677–686 (2019).

- 654 47. A. Bateman, The structure of a domain common to archaeobacteria and the homocystinuria  
655 disease protein. *Trends Biochem. Sci.* **22**, 12–13 (1997).
- 656 48. A. A. Baykov, H. K. Tuominen, R. Lahti, The CBS domain: a protein module with an  
657 emerging prominent role in regulation. *ACS Chem. Biol.* **6**, 1156–1163 (2011).
- 658 49. K. H. Jhee, P. McPhie, E. W. Miles, Domain architecture of the heme-independent yeast  
659 cystathionine beta-synthase provides insights into mechanisms of catalysis and regulation.  
660 *Biochemistry* **39**, 10548–10556 (2000).
- 661 50. K. N. Maclean, M. Janosík, J. Oliveriusová, V. Kery, J. P. Kraus, Transsulfuration in  
662 *Saccharomyces cerevisiae* is not dependent on heme: purification and characterization of  
663 recombinant yeast cystathionine beta-synthase. *J. Inorg. Biochem.* **81**, 161–171 (2000).
- 664 51. D. Marciano, M. Santana, C. Nowicki, Functional characterization of enzymes involved  
665 in cysteine biosynthesis and H<sub>2</sub>S production in *Trypanosoma cruzi*. *Mol. Biochem.*  
666 *Parasitol.* **185**, 114–120 (2012).
- 667 52. J. Ereño-Orbea, T. Majtan, I. Oyenarte, J. P. Kraus, L. A. Martínez-Cruz, Structural basis  
668 of regulation and oligomerization of human cystathionine  $\beta$ -synthase, the central enzyme  
669 of transsulfuration. *Proc. Natl. Acad. Sci. U. S. A.* **110**, E3790-9 (2013).
- 670 53. P. Giménez-Mascarell, *et al.*, Crystal structure of cystathionine  $\beta$ -synthase from honeybee  
671 *Apis mellifera*. *J. Struct. Biol.* **202**, 82–93 (2018).
- 672 54. C. Conter, *et al.*, Cystathionine  $\beta$ -synthase is involved in cysteine biosynthesis and H<sub>2</sub>S  
673 generation in *Toxoplasma gondii*. *Sci. Rep.* **10**, 14657 (2020).
- 674 55. M. P. Ferla, W. M. Patrick, Bacterial methionine biosynthesis. *Microbiology* **160**, 1571–  
675 1584 (2014).
- 676 56. H. Song, R. Xu, Z. Guo, Identification and characterization of a methionine  $\gamma$ -lyase in the  
677 calicheamicin biosynthetic cluster of *Micromonospora echinospora*. *Chembiochem* **16**,  
678 100–109 (2015).

- 679 57. M. Meier, M. Janosik, V. Kery, J. P. Kraus, P. Burkhard, Structure of human cystathionine  
680 beta-synthase: a unique pyridoxal 5'-phosphate-dependent heme protein. *EMBO J.* **20**,  
681 3910–3916 (2001).
- 682 58. N. L. Tuite, K. R. Fraser, C. P. O'byrne, Homocysteine toxicity in *Escherichia coli* is  
683 caused by a perturbation of branched-chain amino acid biosynthesis. *J. Bacteriol.* **187**,  
684 4362–4371 (2005).
- 685 59. H. Yan, *et al.*, Increase in desulfurization activity of *Rhodococcus erythropolis* KA2-5-1  
686 using ethanol feeding. *J. Biosci. Bioeng.* **89**, 361–366 (2000).
- 687 60. E. M. Musiol-Kroll, A. Tocchetti, M. Sosio, E. Stegmann, Challenges and advances in  
688 genetic manipulation of filamentous actinomycetes - the remarkable producers of  
689 specialized metabolites. *Nat. Prod. Rep.* **36**, 1351–1369 (2019).
- 690 61. A. Cenicerros, L. Dijkhuizen, M. Petrusma, M. H. Medema, Genome-based exploration of  
691 the specialized metabolic capacities of the genus *Rhodococcus*. *BMC Genomics* **18**, 593  
692 (2017).
- 693 62. S. K. Hatzios, C. R. Bertozzi, The regulation of sulfur metabolism in *Mycobacterium*  
694 tuberculosis. *PLoS Pathog.* **7**, e1002036 (2011).
- 695

696 **Figures**

697

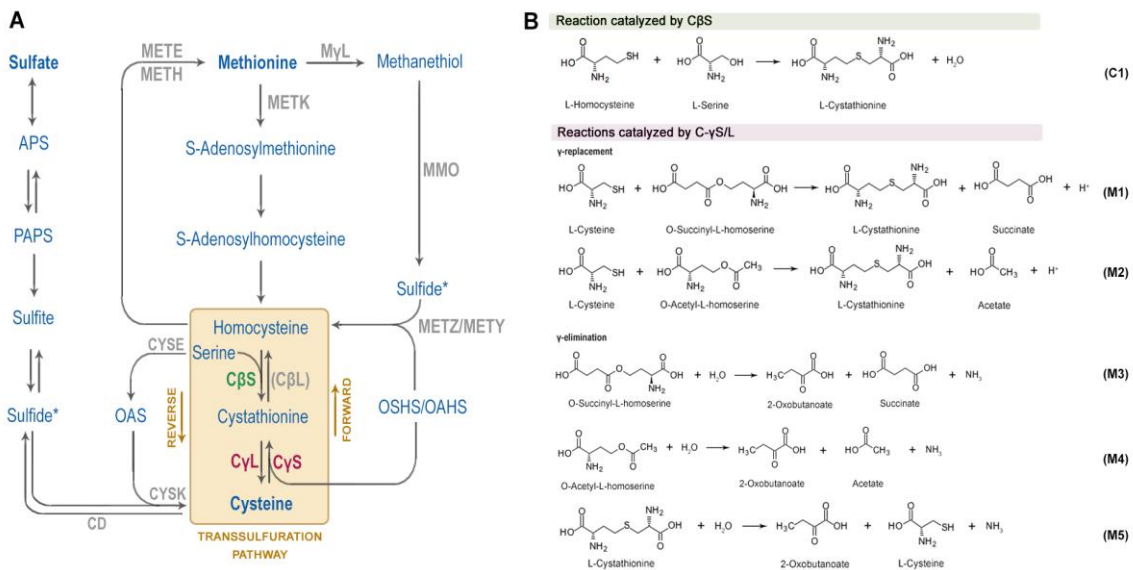

698

699 **Figure 1. Bacterial sulfur metabolism.** (A) Overview of Methionine and Cysteine  
 700 biosynthesis and interconversion in bacteria as part of the sulfur assimilation pathway (APS:  
 701 Adenylylsulfate, PAPS: 3' Phosphoadenylyl sulfate, OAS: O-acetyl-L-serine, OSHS: O-  
 702 succinyl-L-homoserine, OAHS: O-acetyl-L-homoserine). (B) Canonical reactions of sulfur  
 703 metabolism catalyzed by CβS, METB (C-γS/L) in the *Corynebacteriales* order.

704

705

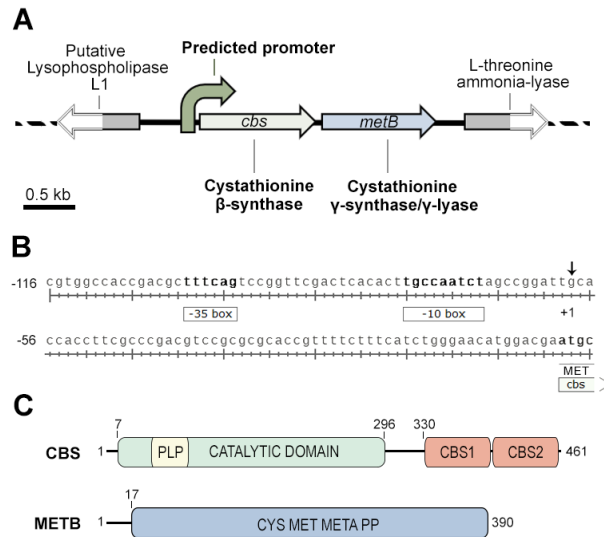

706

707 **Figure 2. Properties of *cbs-metB* genetic loci and proteins.** (A) Scheme of the *cbs-metB* gene

708 cluster. (B) Bacterial promoter predicted sequence. -35 and -10 boxes are displayed, whereas

709 an arrow indicates the predicted transcription initiation site (+1). (C) Schematic diagram of

710 C $\beta$ S and METB (C- $\gamma$ S/L) domain distribution. See main text for details.

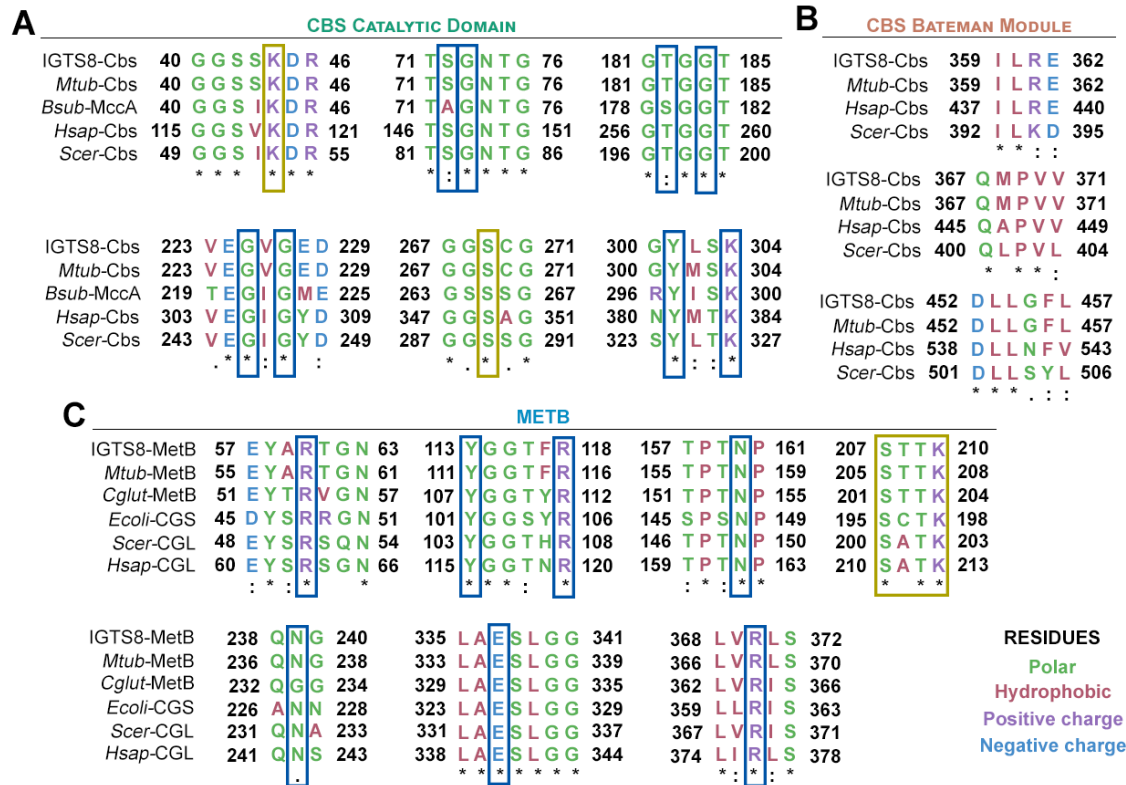

711

712 **Figure 3. Multiple sequence alignments of C $\beta$ S and C- $\gamma$ S/L, displaying only conserved**

713 **residues configuring the active sites. (A) Comparison of *R. qingshengii* IGTS8 C $\beta$ S with *M.***

714 ***tuberculosis* cystathionine  $\beta$ -synthase (Uniprot accession No: P9WP51); *B. subtilis* MccA**

715 **(Uniprot accession No: O05393); Human C $\beta$ S (Uniprot accession No: P35520-1); and *S.***

716 ***cerevisiae* C $\beta$ S (Uniprot accession No: P32582). (B) Comparison of *R. qingshengii* IGTS8**

717 **METB with *M. tuberculosis* C- $\gamma$ S/L (Uniprot accession No: P9WGB7); *C. glutamicum* C $\gamma$ S**

718 **(Uniprot accession No: Q79VD9); *E. coli* cystathionine  $\gamma$ -synthase (Uniprot accession No:**

719 **P00935); *S. cerevisiae* cystathionine  $\gamma$ -lyase (Uniprot accession No: P31373) and Human**

720 **cystathionine  $\gamma$ -lyase (Uniprot accession No: P32929). All multiple sequence alignments were**

721 **done using ClustalO. Dashes indicate gaps introduced for alignment optimization. Asterisks**

722 **(\*) indicate fully conserved residues; double dots (: ) denote strongly conserved residues and**

723 **(.) show weakly conserved residues. Residues in yellow boxes participate in PLP-binding. Blue**

724 **boxes denote residues involved in substrate binding (57,22).**



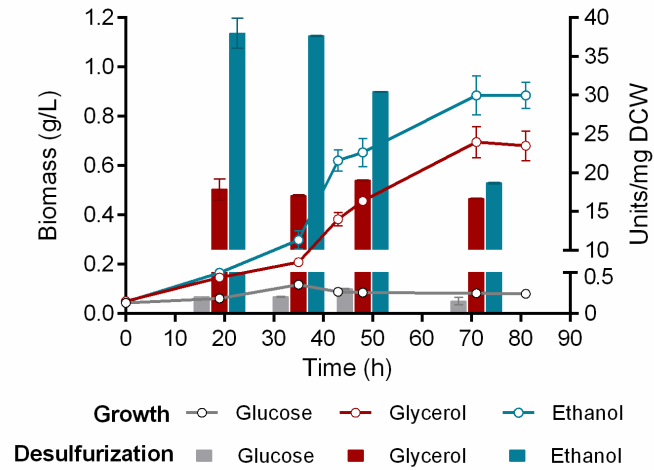

725

726 **Figure 4. Ethanol is a preferred carbon source for *R. qingshengii* IGTS8.** Effect of different

727 carbon sources (0.055 M Glucose, 0.110 M Glycerol, 0.165 M Ethanol) on growth (Biomass;

728 g/L) and BDS activity (Units 2-HBP/mg DCW) of *R. qingshengii* IGTS8. DMSO at a

729 concentration of 1 mM was used as the sole sulfur source.

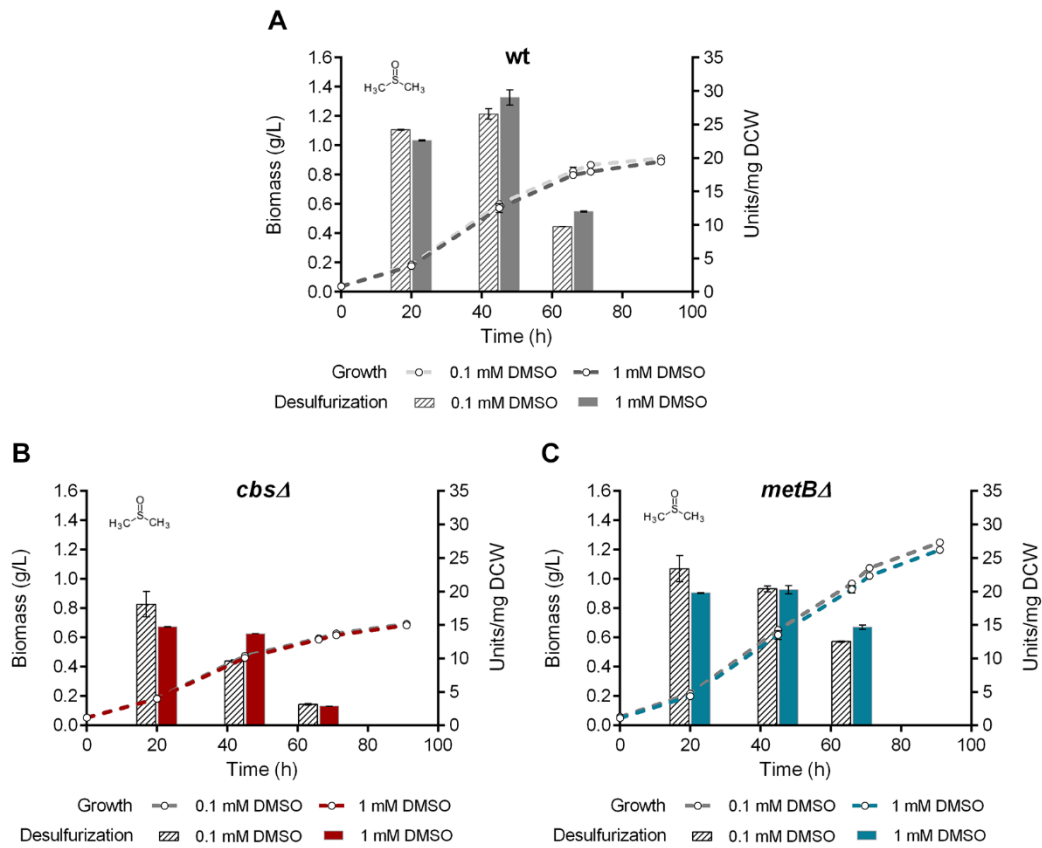

730

731 **Figure 5. C $\beta$ S and METB are not essential for growth and BDS in the presence of DMSO.**

732 (A-C) Growth (Biomass; g/L) and desulfurization capability (Units 2-HBP/mg DCW) of wt

733 (A), *cbsΔ* (B), and (C) *metBΔ* strains, grown on CDM in the presence of low (0.1 mM) and

734 high (1 mM) *DMSO* concentrations.

735

736

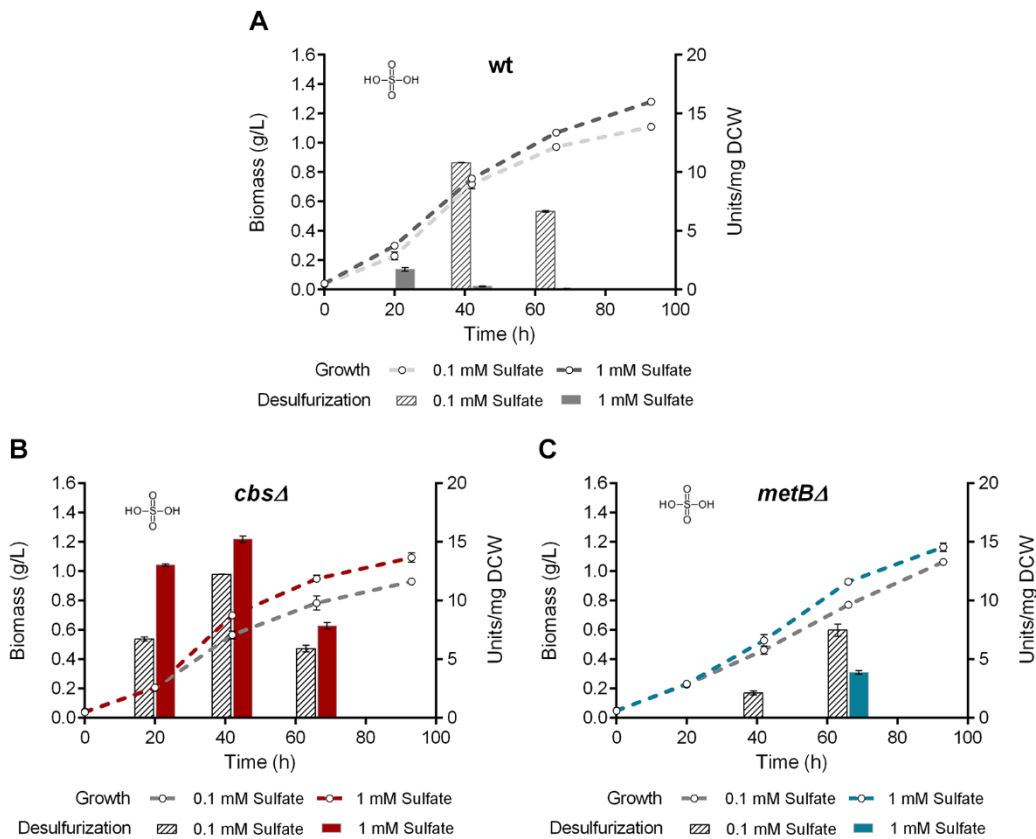

737

738 **Figure 6. Recombinant strains desulfurize in the presence of sulfate.** Growth curves  
739 (Biomass; g/L) and biodesulfurization efficiencies (Units 2-HBP/mg DCW) of *wt* (A), *cbsA*  
740 (B), and *metBΔ* (C) isogenic strains, in the presence of low and high *sulfate* concentrations as  
741 sole sulfur sources.

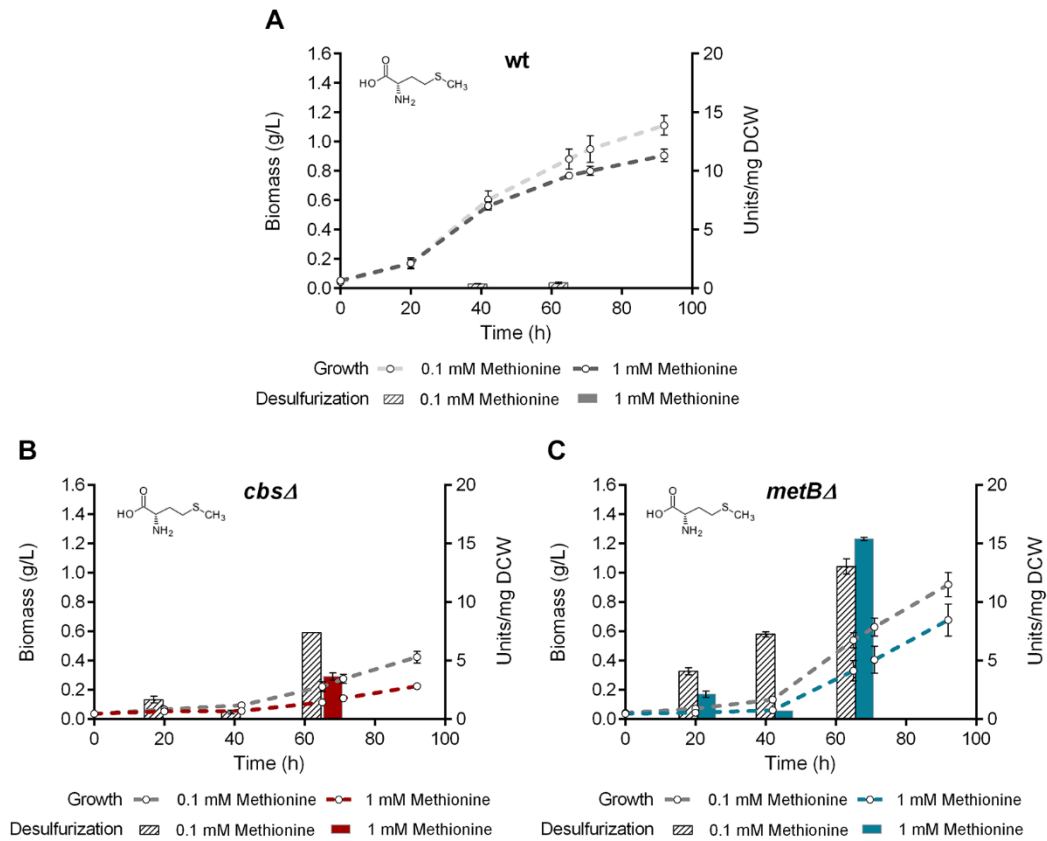

742

743 **Figure 7. Methionine does not repress the BDS phenotype of recombinant strains.** Growth  
744 curves (Biomass; g/L) and biodesulfurization efficiencies (Units 2-HBP/mg DCW) in the  
745 presence of low (0.1 mM) and high (1 mM) *L-methionine* concentration, for wt (A), *cbsΔ* (B),  
746 and *metBΔ* (C) isogenic strains.

747

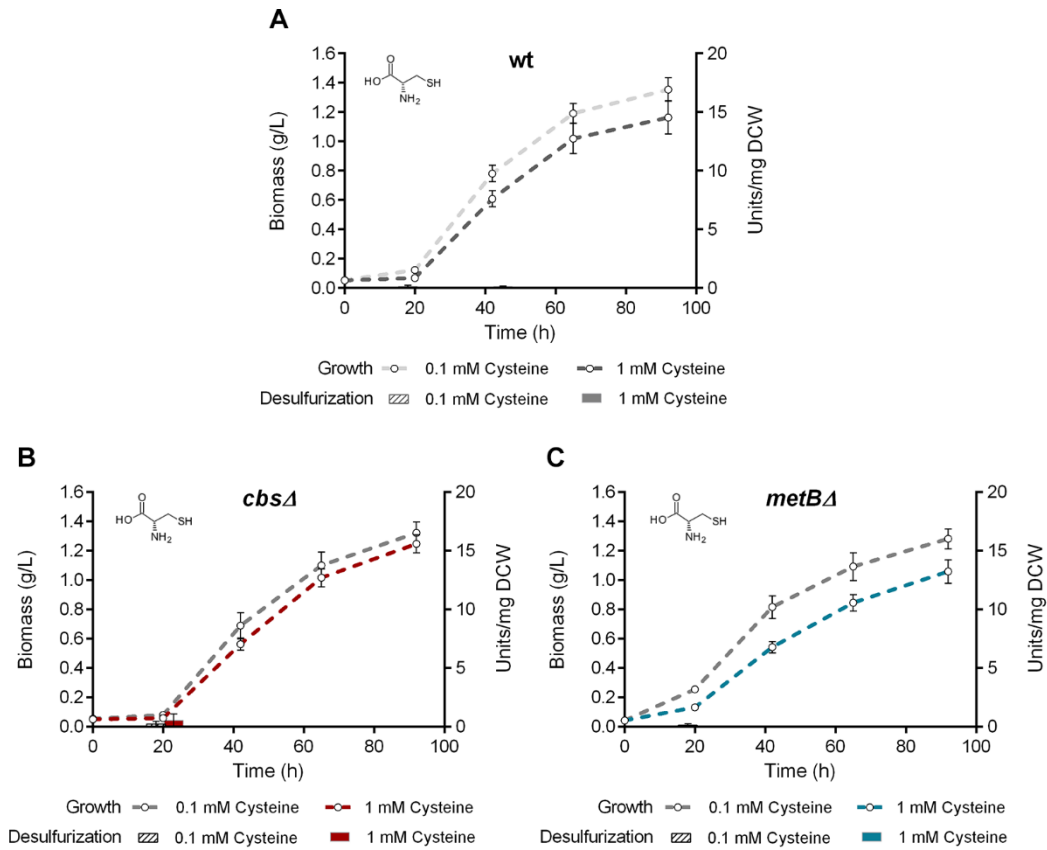

748

749 **Figure 8. Cysteine negatively affects the biodesulfurization phenotype of wt and knockout**  
750 **strains.** Growth curves (Biomass; g/L) and biodesulfurization efficiencies (Units 2-HBP/mg  
751 DCW) in the presence of low (0.1 mM) and high (1 mM) L-cysteine concentration, for wt (A),  
752 *cbsΔ* (B), and *metBΔ* (C) isogenic strains.

753

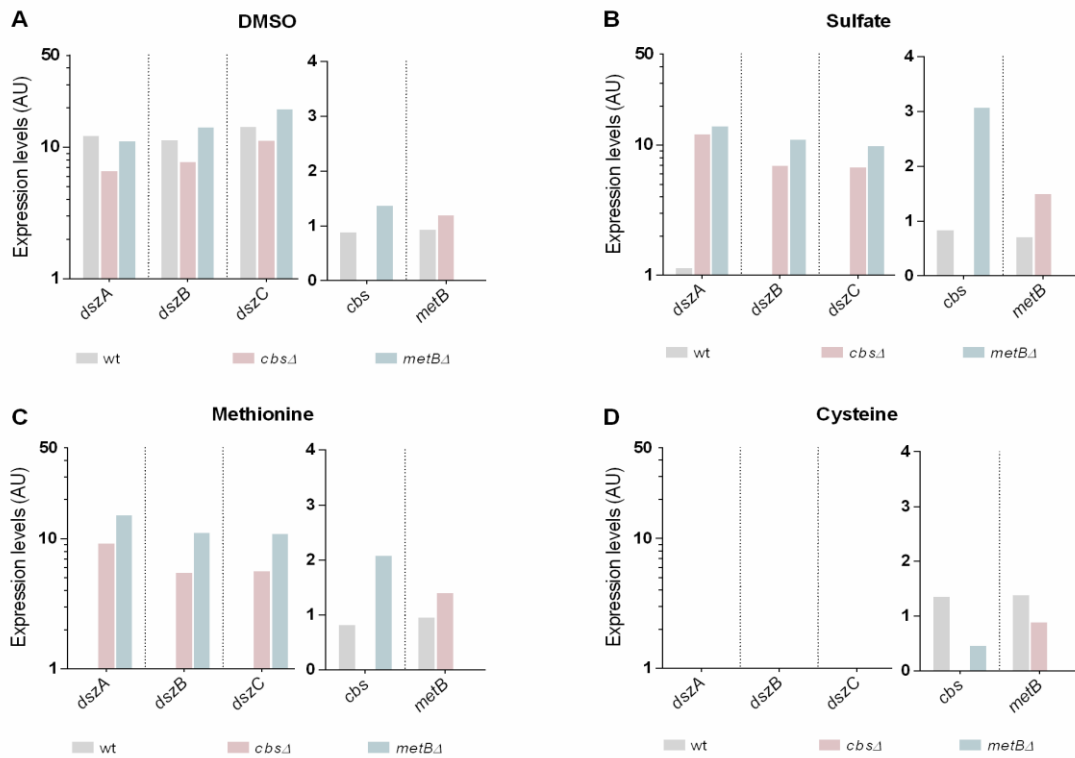

754

755 **Figure 9. C $\beta$ S and METB are critical for desulfurization genes *dszABC* expression in the**  
756 **presence of sulfate and methionine.** Comparison of *dszA*, *dszB*, *dszC*, *cbs* and *metB*  
757 transcriptional levels for wt, *cbs* $\Delta$  and *metB* $\Delta$  isogenic strains, grown on 1 mM (A) DMSO, (B)  
758 Sulfate, (C) Methionine, or (D) Cysteine. Samples were collected from mid-log phase cultures  
759 (AU: Arbitrary Units; Relative expression levels compared to the calibrator sample.  
760 Logarithmic scale is used for *dszABC*. For details see Materials and Methods).

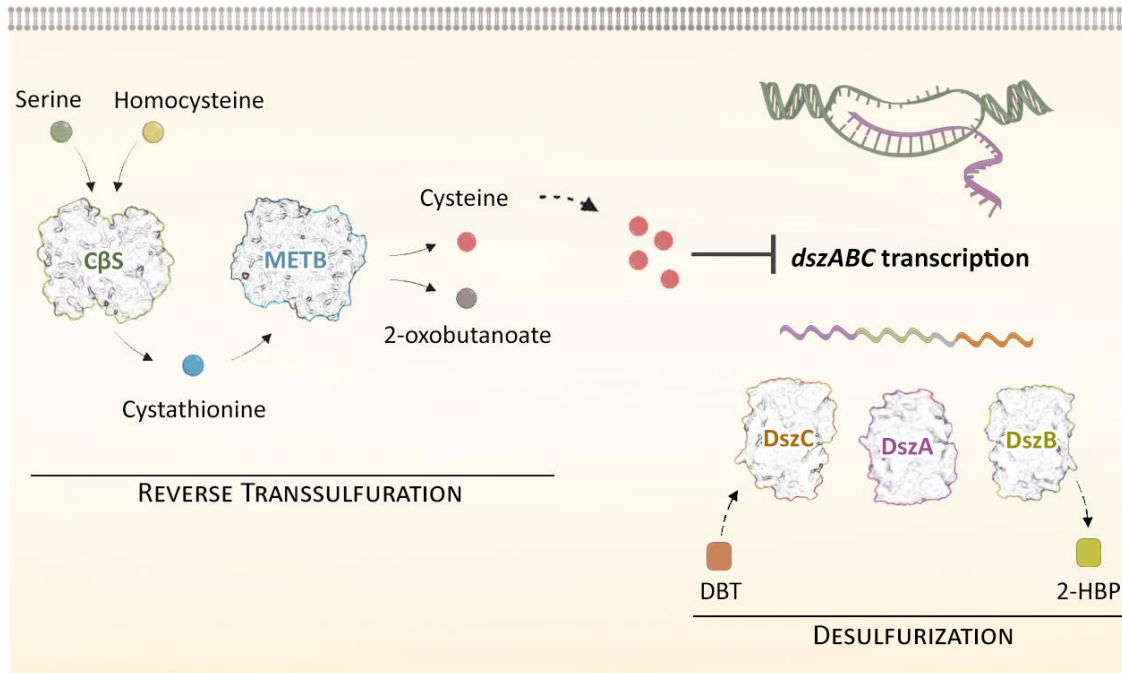

761

762 **Figure 10. Proposed model illustrating the role of C $\beta$ S and MetB (C- $\gamma$ S/L) in the**

763 **regulation of desulfurization for *Rhodococcus qingshengii* IGTS8.** Sulfate or methionine

764 addition in the culture media, most likely necessitates reverse transsulfuration metabolic

765 reactions as the primary route for cysteine biosynthesis. Fine-tuning of sulfur assimilation via

766 intracellular cysteine levels is a common theme in bacterial species, where it seems to have evolved as

767 a cellular mechanism to control gene expression appropriately, based on the available sulfur source type

768 and abundancy. An increase in the free cysteine pool is suspected to exert an effect (directly or

769 indirectly) on *dszABC* gene expression, leading to lack of biodesulfurization activity. Gene

770 deletions of *cbs* or *metB*, abolish the cysteine-mediated *dsz* repression in the presence of

771 selected sulfur sources, such as sulfate and methionine, thus leading to detectable transcript

772 levels and biodesulfurization activity.

773 **Tables**

774 **Table 1.** Bacterial strains and plasmids used in this study.

| Name                             | Description                                                                                      | Reference or Source  |
|----------------------------------|--------------------------------------------------------------------------------------------------|----------------------|
| <b>Strains</b>                   |                                                                                                  |                      |
| <i>R. qingshengii</i> IGTS8 (wt) | DBT-degrading bacterium, Wild-type (wt) strain                                                   | ATCC 53968           |
| <i>cbs</i> Δ                     | Genetically engineered IGTS8 strain with <i>cbs</i> gene deletion                                | This study           |
| <i>metB</i> Δ                    | Genetically engineered IGTS8 strain with <i>metB</i> gene deletion                               | This study           |
| <i>E. coli</i> DH5a              | F' Δ(lacZYA-argF) U169 <i>hsdR17</i> (rk <sup>-</sup> mk <sup>+</sup> ) <i>recA1 endA1 relA1</i> | Laboratory stock     |
| <i>E. coli</i> S17-1             | <i>recA</i> pro <i>hsdR</i> RP4-2-Tc::MuKm::Tn7                                                  | ATCC 47055           |
| <b>Plasmids</b>                  |                                                                                                  |                      |
| pK18mobsacB                      | Suicide vector derived from plasmid pK18; RP4 <i>mob</i> , <i>sacB</i> , KanR                    | Schafer et al., 1994 |
| pIGTS8 <i>cbs</i>                | Derived from pK18mobsacB for <i>cbs</i> gene deletion; RP4 <i>mob</i> , <i>sacB</i> , KanR       | This study           |
| pIGTS8 <i>metB</i>               | Derived from pK18mobsacB for <i>metB</i> gene deletion; RP4 <i>mob</i> , <i>sacB</i> , KanR      | This study           |

775

776



777 **Supplementary Material**

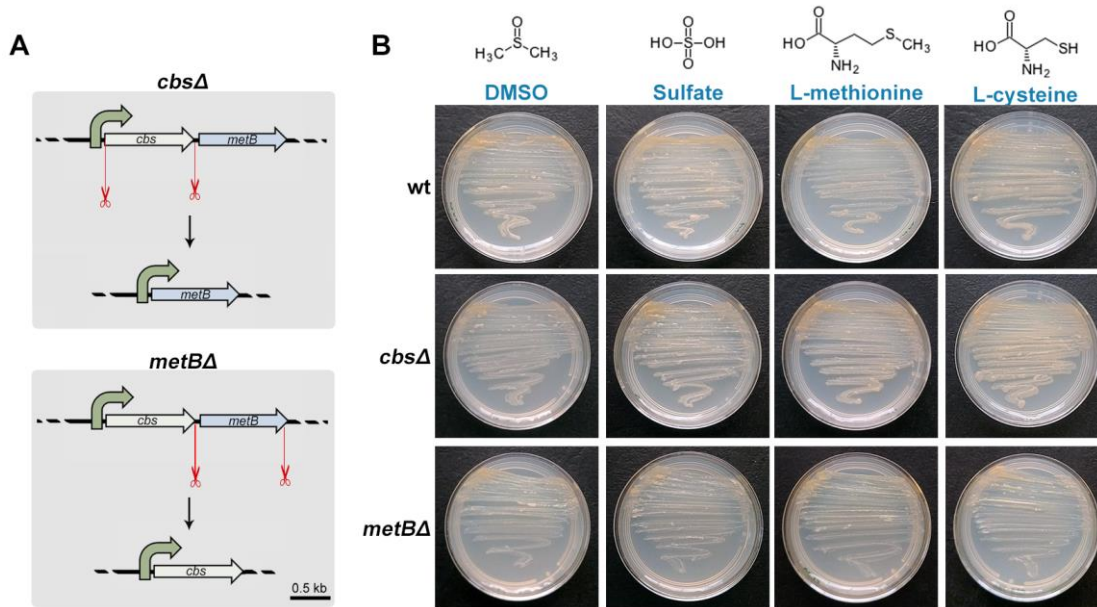

778

779 **Figure S1. Cartoon and growth tests of strains *cbsΔ* and *metBΔ*.** (A) Diagram of gene  
780 knockouts. Upper panel: Targeted *cbs* ORF deletion of 1386 bp. *metB* is expressed from the  
781 promoter sequence located in the upstream flanking sequence of the genetic locus. Lower  
782 panel: Deletion of 1168 bp within the *metB* ORF. (B) Growth tests of wild-type (wt) *R.*  
783 *qingshengii* IGTS8 and knockout strains *cbsΔ*, *metBΔ*. Basal minimal medium was  
784 supplemented with ethanol as a carbon source and 1mM of each sulfur source.

785

786

787

788 **Table S2.** Oligonucleotides used in this study.

| Name                     | Sequence (5' - 3')                 |
|--------------------------|------------------------------------|
| <b>Gene deletions</b>    |                                    |
| <i>cbsUp-F</i>           | CGCGAAGCTTGCGAAGGCTTTCCACTGGGTTGCC |
| <i>cbsUp-R</i>           | GCGCCTGCAGTCGTCCATGTTCCCAGATGAAAGA |
| <i>cbsDown-F</i>         | GCGCCCCGGGGTTCGGATTCTGCGCCGGCACCG  |
| <i>cbsDown-R</i>         | CGCGCCCCGGGCCGCCCTTGAGGCGGACGGAG   |
| <i>metBUp-F</i>          | GCGCAAGCTTGACCGCATCGCCGTCAAGATG    |
| <i>metBUp-R</i>          | GCGCTCTAGACAGGAATCCGAACTCAGGAATCC  |
| <i>metBDown-F</i>        | GCGCTCTAGAGATCTGGTCGGCGACATCGAG    |
| <i>metBDown-R</i>        | GCGCGGATCCCACTTCGTTCGAGTGCAAGTTCG  |
| <b>Sequencing</b>        |                                    |
| <i>M13F</i>              | AGGGTTTTCCCAGTCACGACGTT            |
| <i>M13R</i>              | GAGCGGATAACAATTTACACAGG            |
| <i>cbs-5F-check</i>      | CAGTAACGGTTGACCGTGACACC            |
| <i>cbs-3F-check</i>      | CATCGACAAGGTCTTCACGCAGTG           |
| <i>cbs-metB-3R-check</i> | GTTTTACATTTCAAGCTCACGGCG           |
| <i>metB-5F-check</i>     | CGGGGGAGGACCGGCGACGAAC             |
| <i>metB-3R-check</i>     | GAAGACGGCTGGCAGATTCAGGTG           |
| <b>qPCR</b>              |                                    |
| <i>QdszAF</i>            | CTACTATCCCCCGTATCACGTTG            |
| <i>QdszAR</i>            | CGTCGTGTTCCAGATGCTGAT              |
| <i>QdszBF</i>            | GCGTATCGACCGGAGCAGT                |
| <i>QdszBR</i>            | GCAAGTTGTTGGTGAGCAGGA              |
| <i>QdszCF</i>            | GGTCCACGGACTTCCACAA                |
| <i>QdszCR</i>            | GCGATCCCCAGATAGACGTTG              |
| <i>QcbsF</i>             | TGGATACAAGTGCGTTTTTCGTC            |
| <i>QcbsR</i>             | GGTGGTCTCGTAGTGGCTCT               |
| <i>QmetBF</i>            | GAGCGTTCAGTTCGGGAATG               |
| <i>QmetBR</i>            | GCGTGAAGACCTTGTTCGATGA             |
| <i>QgyrBF</i>            | GCTGCCAGAAGTCAGATACA               |
| <i>QgyrBR</i>            | TCGACGACCTCCCAAATGAG               |

789
